# Supplementary material
Source: PubMed Central journal article supplement (PMC8632302)
Supplement: KAUP_A_1872241_SM5917.pdf [file KAUP_A_1872241_SM5917.pdf]

|             | Mia-paca2 | Calu-1 | AGS    | BX-PC3 | Ca-ski | CX-1   |
|-------------|-----------|--------|--------|--------|--------|--------|
| MAP1LC3B-I  |           |        |        |        |        |        |
| MAP1LC3B-II |           |        |        |        |        |        |
| SQSTM1      |           |        |        |        |        |        |
| GPX4        |           |        |        |        |        |        |
| SLC7A11     |           |        |        |        |        |        |
| ACTB        |           |        |        |        |        |        |
| Erastin     | -36-36    | -36-36 | -36-36 | -36-36 | -36-36 | -36-36 |
| RSL3        | -36-36    | -36-36 | -36-36 | -36-36 | -36-36 | -36-36 |
| Chloroquine | ++++      | ++++   | ++++   | ++++   | ++++   | ++++   |

  

|             | Melane-3 | OVARC-5 | HT1080 | Panc-1 | PC-3   | RKO    |
|-------------|----------|---------|--------|--------|--------|--------|
| MAP1LC3B-I  |          |         |        |        |        |        |
| MAP1LC3B-II |          |         |        |        |        |        |
| SQSTM1      |          |         |        |        |        |        |
| GPX4        |          |         |        |        |        |        |
| SLC7A11     |          |         |        |        |        |        |
| ACTB        |          |         |        |        |        |        |
| Erastin     | -36-36   | -36-36  | -36-36 | -36-36 | -36-36 | -36-36 |
| RSL3        | -36-36   | -36-36  | -36-36 | -36-36 | -36-36 | -36-36 |
| Chloroquine | ++++     | ++++    | ++++   | ++++   | ++++   | ++++   |

  

|             | 7860   | SK-MEL-28 | A549   | Hela   | Du-145 | HCG-1954 |
|-------------|--------|-----------|--------|--------|--------|----------|
| MAP1LC3B-I  |        |           |        |        |        |          |
| MAP1LC3B-II |        |           |        |        |        |          |
| SQSTM1      |        |           |        |        |        |          |
| GPX4        |        |           |        |        |        |          |
| SLC7A11     |        |           |        |        |        |          |
| ACTB        |        |           |        |        |        |          |
| Erastin     | -36-36 | -36-36    | -36-36 | -36-36 | -36-36 | -36-36   |
| RSL3        | -36-36 | -36-36    | -36-36 | -36-36 | -36-36 | -36-36   |
| Chloroquine | ++++   | ++++      | ++++   | ++++   | ++++   | ++++     |

  

|             | SK-HEP-1 | SW1990 | ACHN   | HT-1376 | NCI-H522 | SAOS-2 |
|-------------|----------|--------|--------|---------|----------|--------|
| MAP1LC3B-I  |          |        |        |         |          |        |
| MAP1LC3B-II |          |        |        |         |          |        |
| SQSTM1      |          |        |        |         |          |        |
| GPX4        |          |        |        |         |          |        |
| SLC7A11     |          |        |        |         |          |        |
| ACTB        |          |        |        |         |          |        |
| Erastin     | -36-36   | -36-36 | -36-36 | -36-36  | -36-36   | -36-36 |
| RSL3        | -36-36   | -36-36 | -36-36 | -36-36  | -36-36   | -36-36 |
| Chloroquine | ++++     | ++++   | ++++   | ++++    | ++++     | ++++   |

  

|             | SK-MEL-5 | T47D   | H4     | NCI-H446 | NCI-H460 | U-118MG |
|-------------|----------|--------|--------|----------|----------|---------|
| MAP1LC3B-I  |          |        |        |          |          |         |
| MAP1LC3B-II |          |        |        |          |          |         |
| SQSTM1      |          |        |        |          |          |         |
| GPX4        |          |        |        |          |          |         |
| SLC7A11     |          |        |        |          |          |         |
| ACTB        |          |        |        |          |          |         |
| Erastin     | -36-36   | -36-36 | -36-36 | -36-36   | -36-36   | -36-36  |
| RSL3        | -36-36   | -36-36 | -36-36 | -36-36   | -36-36   | -36-36  |
| Chloroquine | ++++     | ++++   | ++++   | ++++     | ++++     | ++++    |

  

|             | 5637   | K562   | UM-UC-3 | Jurkat | CFPAC-1 | CAPAN-2 |
|-------------|--------|--------|---------|--------|---------|---------|
| MAP1LC3B-I  |        |        |         |        |         |         |
| MAP1LC3B-II |        |        |         |        |         |         |
| SQSTM1      |        |        |         |        |         |         |
| GPX4        |        |        |         |        |         |         |
| SLC7A11     |        |        |         |        |         |         |
| ACTB        |        |        |         |        |         |         |
| Erastin     | -36-36 | -36-36 | -36-36  | -36-36 | -36-36  | -36-36  |
| RSL3        | -36-36 | -36-36 | -36-36  | -36-36 | -36-36  | -36-36  |
| Chloroquine | ++++   | ++++   | ++++    | ++++   | ++++    | ++++    |

  

|             | SK-MEL-2 | HT-29  | HPAF-II | A-704  | MB-435S | A172   |
|-------------|----------|--------|---------|--------|---------|--------|
| MAP1LC3B-I  |          |        |         |        |         |        |
| MAP1LC3B-II |          |        |         |        |         |        |
| SQSTM1      |          |        |         |        |         |        |
| GPX4        |          |        |         |        |         |        |
| SLC7A11     |          |        |         |        |         |        |
| ACTB        |          |        |         |        |         |        |
| Erastin     | -36-36   | -36-36 | -36-36  | -36-36 | -36-36  | -36-36 |
| RSL3        | -36-36   | -36-36 | -36-36  | -36-36 | -36-36  | -36-36 |
| Chloroquine | ++++     | ++++   | ++++    | ++++   | ++++    | ++++   |

  

|             | HCT-116 | U2OS   | HU7    | N-87MG | OVARC-8 | OVARC-3 |
|-------------|---------|--------|--------|--------|---------|---------|
| MAP1LC3B-I  |         |        |        |        |         |         |
| MAP1LC3B-II |         |        |        |        |         |         |
| SQSTM1      |         |        |        |        |         |         |
| GPX4        |         |        |        |        |         |         |
| SLC7A11     |         |        |        |        |         |         |
| ACTB        |         |        |        |        |         |         |
| Erastin     | -36-36  | -36-36 | -36-36 | -36-36 | -36-36  | -36-36  |
| RSL3        | -36-36  | -36-36 | -36-36 | -36-36 | -36-36  | -36-36  |
| Chloroquine | ++++    | ++++   | ++++   | ++++   | ++++    | ++++    |

  

|             | OVARC-429 | OVARC-432 | SKOV3  | BG-1   | HS578T | HEGP2  |
|-------------|-----------|-----------|--------|--------|--------|--------|
| MAP1LC3B-I  |           |           |        |        |        |        |
| MAP1LC3B-II |           |           |        |        |        |        |
| SQSTM1      |           |           |        |        |        |        |
| GPX4        |           |           |        |        |        |        |
| SLC7A11     |           |           |        |        |        |        |
| ACTB        |           |           |        |        |        |        |
| Erastin     | -36-36    | -36-36    | -36-36 | -36-36 | -36-36 | -36-36 |
| RSL3        | -36-36    | -36-36    | -36-36 | -36-36 | -36-36 | -36-36 |
| Chloroquine | ++++      | ++++      | ++++   | ++++   | ++++   | ++++   |

  

|             | HEY    | IGROV1 | PEO4   | HEYA8  | A498   | MCF-7  |
|-------------|--------|--------|--------|--------|--------|--------|
| MAP1LC3B-I  |        |        |        |        |        |        |
| MAP1LC3B-II |        |        |        |        |        |        |
| SQSTM1      |        |        |        |        |        |        |
| GPX4        |        |        |        |        |        |        |
| SLC7A11     |        |        |        |        |        |        |
| ACTB        |        |        |        |        |        |        |
| Erastin     | -36-36 | -36-36 | -36-36 | -36-36 | -36-36 | -36-36 |
| RSL3        | -36-36 | -36-36 | -36-36 | -36-36 | -36-36 | -36-36 |
| Chloroquine | ++++   | ++++   | ++++   | ++++   | ++++   | ++++   |

**Figure S1.** Protein expression profiles of MAP1LC3B-II, SQSTM1, GPX4, and SLC7A11 in indicated cancer cell lines following treatment with erastin (20  $\mu$ M) or RSL3 (0.5  $\mu$ M) in the absence or presence of chloroquine (CQ, 50  $\mu$ M) for 3 and 6 h.

Protein was collected from each cell line in 3 biologically independent samples and mixed together for western blot analysis.
